# Supplementary material for: Incidence and Severity of Community- and Hospital-Acquired Hyponatremia in Pediatrics
Source: MDPI journal article supplement (doi:10.3390/jcm11247522), 2022-12-19
Supplement: s1 [file s1]

**Supplementary Table S1:** Diagnostic groups, ICD-9 and ICD-10 disease and procedural codes.

| Diagnostic Groups          | Diagnosis and Codification                                     |                                    |                            |
|----------------------------|----------------------------------------------------------------|------------------------------------|----------------------------|
|                            | Diagnosis                                                      | ICD9                               | ICD10                      |
| Infections                 | Septicemia                                                     | 038, 790.7                         | A39, A40, A41, A49, R78.81 |
|                            | Meningitis                                                     | 047, 094, 320–322, 324             | A17, A87, G00, G03         |
|                            | Encephalitis                                                   | 063, 064, 052.0, 054.3, 058.2, 323 | G04, G05, A86              |
|                            | Pneumonia                                                      | 480–488                            | J12–J18                    |
|                            | Upper respiratory tract infections                             | 460–464, 470–478                   | J00–J06, J30–J39           |
|                            | Bronchiolitis                                                  | 466.1                              | J21                        |
|                            | Other respiratory infections                                   | 465.8, 465.9                       | J22                        |
|                            | Viral infections                                               | 050–075, 079.99                    | A08, B00–B34, B97          |
|                            | Diarrhea                                                       | 001–009, 787.91                    | A09, R19.7                 |
|                            | Urinary tract infections                                       | 595, 599                           | N30, N39                   |
|                            | Pyelonephritis                                                 | 590                                | N10–N11, N13.6             |
|                            | Cellulitis                                                     | 376.01, 528.3, 681, 682, 684       | L01–L08, H05               |
|                            | Osteomyelitis *                                                | 730                                | M86                        |
|                            | Myocarditis \$                                                 | 422, 429.0                         | I40, I41                   |
|                            | Abscess                                                        | 475, 510, 513, 556, 566            | J36, J85, K61              |
|                            | Otitis Media                                                   | 380–382                            | H65, H66, H70              |
|                            | Toxic Shock Syndrome                                           | 040.82                             | A48                        |
|                            | Steven Johnson Syndrome                                        | 695.13, 695.14                     | L51.3, L51.4               |
|                            | Miscellaneous                                                  | 780.6, 996.67, 998.59              | N45.3, R50.9, T81.4        |
|                            | Diagnosis                                                      | ICD9                               | ICD10                      |
| Respiratory disorders      | Chronic diseases of upper airway                               | 470–478                            | J32–35, J37                |
|                            | Asthma, Bronchitis                                             | 490–496                            | J40, J42, J45.901          |
|                            | Pneumothorax, Other diseases of lung and respiratory system    | 510–519                            | J93, J95, J98              |
|                            | Acute respiratory failure                                      | 518.81                             | J96                        |
|                            | Acute bronchospasm                                             | 519.11                             | J98.01                     |
|                            | Symptoms of respiratory system- apnea, dyspnea, stridor, cough | 786.1, 786.2, 786.03, 786.0        | R04, 06, 07, 09            |
|                            | Foreign body in upper airways                                  | 933                                | T16–T17                    |
|                            | Diagnosis                                                      | ICD9                               | ICD10                      |
| Cardiovascular disorders   | Hypertension                                                   | 401                                | I10–I16                    |
|                            | Inflammatory pericardial diseases                              | 420, 423                           | I30, I31, I32              |
|                            | Cardiac dysrhythmias                                           | 427, 785                           | I44– I49, R00              |
|                            | Kawasaki's disease                                             | 446.1                              | M30.3                      |
|                            | Venous thrombosis                                              | 453                                | I82                        |
|                            | Syncope                                                        | 780.2                              | R42, R55                   |
|                            | Chest pain                                                     | 786.5                              | R07.2, R07.8               |
|                            | Congenital anomalies of heart                                  | 745–747                            | Q22–Q25                    |
|                            | Diagnosis                                                      | ICD9                               | ICD10                      |
| Gastrointestinal disorders | Supernumerary tooth                                            | 520.1                              | K00.1                      |
|                            | Dental caries, Chronic gingivitis                              | 521.0, 523.1                       | K02, K05.1                 |
|                            | Aphthous ulcers                                                | 528.2                              | K12.0                      |
|                            | Gastroesophageal reflux                                        | 530.81                             | K21                        |
|                            | Gastritis                                                      | 535                                | K29.0                      |

|                                   |                                                      |               |                             |
|-----------------------------------|------------------------------------------------------|---------------|-----------------------------|
|                                   | Crohn's disease, Ulcerative colitis, Irritable colon | 555, 556      | K50, K51, K58               |
|                                   | Non-infectious gastroenteritis and colitis           | 558           | K52                         |
|                                   | Constipation, Fecal impaction                        | 564.0, 560.32 | K59.0, K56.41               |
|                                   | Malabsorption                                        | 579           | K90                         |
|                                   | Other disorders of biliary tract                     | 576           | K87                         |
|                                   | Vomiting                                             | 787.0         | R11                         |
|                                   | Abdominal pain                                       | 789.0         | R10                         |
|                                   | Foreign body in digestive tract                      | 935–938       | T18                         |
|                                   | Mesenteric adenitis                                  | 289.2         | I88.0                       |
|                                   | Hematemesis, Malena                                  | 578           | K92.0, K92.1                |
| Genito-urinary disorders          | Diagnosis                                            | ICD9          | ICD10                       |
|                                   | Acute and Chronic glomerulonephritis                 | 580, 582      | N00–N03                     |
|                                   | Renal failure                                        | 584           | N17–N19                     |
|                                   | Nephrotic syndrome                                   | 581           | N04                         |
|                                   | Renal colic                                          | 788.0         | N20, N23                    |
|                                   | Follicular cyst of ovary                             | 620           | N83.0                       |
|                                   | Hematuria                                            | N/A           | R31                         |
|                                   | Epididymo-orchitis                                   | 604           | N45.3                       |
| Neurological disorders            | Diagnosis                                            | ICD9          | ICD10                       |
|                                   | Epilepsy                                             | 345           | G40                         |
|                                   | Migraine                                             | 346           | G43                         |
|                                   | Convulsions                                          | 780.3         | R56                         |
|                                   | Headache                                             | 339, 784.0    | G44, R51                    |
|                                   | Benign Intracranial Hypertension                     | 348.2         | G93.2                       |
|                                   | Ataxia                                               | 334           | G32.81, R27.0               |
|                                   | Transverse myelitis                                  | 341.2         | G37.3                       |
|                                   | Hemiplegia                                           | 342           | G81                         |
|                                   | Cerebral palsy                                       | 343           | G80                         |
| Endocrine and Metabolic disorders | Diagnosis                                            | ICD9          | ICD10                       |
|                                   | Diabetes Mellitus                                    | 250           | E10                         |
|                                   | Precocious puberty                                   | 259.1         | E30.1                       |
|                                   | Short stature                                        | 783.43        | R62.52                      |
|                                   | Hypothyroidism                                       | 243, 244      | E03                         |
|                                   | Acidosis, Alkalosis                                  | 276.2, 276.3  | E87.2, E87.3                |
|                                   | Hypoglycemia                                         | 251.2         | E16.1, E16.2                |
|                                   | Diagnosis                                            | ICD9          | ICD10                       |
| Musculoskeletal disorders         | Juvenile Idiopathic Arthritis                        | 714.3         | M08                         |
|                                   | Other nonspecific arthritis                          | 716           | M07, M13                    |
|                                   | Torticollis                                          | 723.5         | M43.6                       |
|                                   | Synovitis                                            | 727.0         | M65.9                       |
|                                   | Tietze's syndrome                                    | 733.6         | M94.0                       |
|                                   | Myalgia                                              | 729.1         | M79.1                       |
|                                   | Diagnosis                                            | ICD9          | ICD10                       |
| Trauma (Surgical)                 | Skull and facial bone fractures                      | 800–802       | S02, S09                    |
|                                   | Fracture of Upper Limb                               | 810–819       | S41–S43, S51, S52, S61, S62 |
|                                   | Fracture of Lower Limb                               | 820–829       | S71, S72, S81, S82,         |
|                                   | Dislocation                                          | 830–839       | S73, S83, S91, S92          |

|                                    |                                                          |                              |                               |
|------------------------------------|----------------------------------------------------------|------------------------------|-------------------------------|
|                                    | Intracranial injury excluding skull fracture             | 851–854                      | S06.4 to S06.9                |
|                                    | Internal injury to chest, abdomen, pelvis                | 860–869                      | S20, S27, S29, S30, S39       |
|                                    | Open wound of head                                       | 873                          | S01                           |
|                                    | Open wound of upper limb                                 | 880–884                      | S41                           |
|                                    | Open wound of back, buttock, genitals, unspecified       | 876–879                      | S31                           |
|                                    | Effects of foreign body entering through orifices        | 930–939                      | T15–T19                       |
| Surgical                           | Diagnosis                                                | ICD9                         | ICD10                         |
|                                    | Tonsillectomy without and with adenoidectomy             | 28.2, 28.3                   | 0CTP, 0CTQ                    |
|                                    | Myringoplasty                                            | 19.4                         | 09Q7, 09Q8                    |
|                                    | Squint surgery                                           | 15.1, 15.2, 15.3, 15.4       | 08BL, 08BM                    |
|                                    | Incision of perianal abscess                             | 49.01                        | 0HB8, 0HB9                    |
|                                    | Appendectomy                                             | 47.0, 47.11                  | 0DTJ                          |
|                                    | Hydrocele repair                                         | 61.2                         | 0V96, 0V97                    |
|                                    | Unilateral orchiectomy                                   | 62.3                         | 0VPD                          |
|                                    | Orchidopexy                                              | 62.5                         | 0VQ9, 0VQB, 0VQC, 0VS9, 0VSB  |
|                                    | Circumcision                                             | 64.0                         | 0VTT                          |
|                                    | Open reduction and internal fixation of fracture         | 79.2, 79.3, 79.5, 79.6, 79.8 | 0PP, 0PQ, 0PS, 0QQ, 0QR, 0QS, |
|                                    | Excision and division of bones, other operations on bone | 77, 78                       | 0QB                           |
|                                    | Arthroscopy                                              | 80.2                         | 0SQC4ZZ, 0SQD4ZZ              |
|                                    | Repair of cruciate ligaments                             | 81.45                        | 0SC4ZX, 0SBD4ZX               |
|                                    | Inguinal hernia repair                                   | 53.0, 53.1                   | 0YQ5, 0YQ6,                   |
|                                    | Dental extraction                                        | 23.1                         | 0CDW, 0CDX                    |
|                                    | Endoscopy                                                | 45.11, 45.21, 45.23, 45.24   | 0DJ0, 0DJ6, 0DJD              |
| Skin and Subcutaneous disorders    | Diagnosis                                                | ICD9                         | ICD10                         |
|                                    | Hemangioma                                               | 228                          | D18                           |
|                                    | Atopic dermatitis                                        | 691–693                      | L20–L22                       |
|                                    | Urticaria                                                | 708.1, 708.9                 | L50.1, L50.9                  |
| Mental Health disorders            | Diagnosis                                                | ICD9                         | ICD10                         |
|                                    | Substance abuse- alcohol, cannabis, opiates              | 305.0, 305.2, 305.5          | F10.12, F11.1, F12.1          |
|                                    | Psychosis                                                | 298                          | F23, F29                      |
|                                    | Anorexia nervosa                                         | 307                          | F50.0                         |
|                                    | Suicidal ideation                                        | E950, E956                   | R45.851                       |
| Hematological and Immune disorders | Anxiety disorders                                        | 300.0                        | F41, F42, F43                 |
|                                    | Diagnosis                                                | ICD9                         | ICD10                         |
|                                    | Nutritional anemias                                      | 280–281                      | D50–D53                       |
|                                    | Hemolytic anemias                                        | 282–283                      | D55–D59                       |
|                                    | Immune thrombocytopenic purpura                          | 287.31                       | D69.3                         |
| Allergy and Toxins                 | Hereditary hypogammaglobulinemia                         | 279.00                       | D80.0                         |
|                                    | Diagnosis                                                | ICD9                         | ICD10                         |
|                                    | Allergic purpura                                         | 287.0                        | D69.0                         |
|                                    | Allergic urticaria                                       | 708.0                        | L50.0                         |

|                                    |                                                              |          |                                                                                   |
|------------------------------------|--------------------------------------------------------------|----------|-----------------------------------------------------------------------------------|
|                                    | Poisoning by drugs, medicinal and biological substances      | 960–979  | T36–T50                                                                           |
|                                    | Toxic effects of non-medicinal substances                    | 980.0    | T51–T65                                                                           |
|                                    | Anaphylactic reactions                                       | 995      | T78.0                                                                             |
| Obstetric/Pregnancy and Childbirth | Diagnosis                                                    | ICD9     | ICD10                                                                             |
|                                    | Abortion                                                     | 632, 637 | O03                                                                               |
|                                    | Preterm labor                                                | 644      | O60                                                                               |
|                                    | Normal labor                                                 | 650      | O80                                                                               |
|                                    | Forceps delivery                                             | 669.5    | O66.5                                                                             |
| Eye disorders                      | Diagnosis                                                    | ICD9     | ICD10                                                                             |
|                                    | Strabismus                                                   | 378      | H49, H50                                                                          |
|                                    | Papilledema, not specified                                   | 377.0    | H47.1                                                                             |
|                                    | Diplopia                                                     | 368.2    | H53.2                                                                             |
|                                    | Nystagmus                                                    | 379.5    | H55                                                                               |
| Miscellaneous disorders            | Diagnosis                                                    | ICD9     | ICD10                                                                             |
|                                    | Observation and evaluation for suspected condition not found | V71      | Z01                                                                               |
|                                    | Special investigation and examinations                       | V72      | Z02                                                                               |
|                                    | Medical observation condition ruled out                      | N/A      | Z03                                                                               |
|                                    | Examination and observation for other reasons                | N/A      | Z04                                                                               |
| Nonsurgical trauma                 | Diagnosis                                                    | ICD9     | ICD10                                                                             |
|                                    | Concussion                                                   | 850      | S06.0, S09.9,                                                                     |
|                                    | Sprains and Strains                                          | 840–848  | S43.4, S49.8, S53.4, S59.1, S63.5–S63.9, S73.1, S79.9, S83.3–S83.9, S93.4, S99.9, |
|                                    | Contusion with intact skin                                   | 920–924  | S20, S30, S40, S50, S60, S70, S80, S90                                            |
|                                    | Burns medically managed                                      | 942–946  | T20–T25                                                                           |
|                                    | Unspecified injury                                           | 959      | T14                                                                               |
|                                    | Child abuse                                                  | 995.5    | T74                                                                               |

“Nonsurgical trauma” corresponds with “Trauma” in Table 1 and “Surgical trauma” is included in “Surgical” category in Table 1.
